# Supplementary material for: Tailoring the pore structure of carbon nanofibers for achieving ultrahigh-energy-density supercapacitors using ionic liquids as electrolytes
Source: Royal Society of Chemistry journal article supplement (doi:10.1039/c5ta10500e), 2016-01-01
Supplement: c5ta10500e1.pdf [file c5ta10500e1.pdf]

Electronic Supplementary information of

## **Tailoring Pore Structure of Carbon Nanofiber for Achieving Ultrahigh-Energy-Density Supercapacitors Using Ionic Liquid as Electrolyte**

Chang Hyo Kim<sup>a</sup>, Jae-Hyung Wee<sup>a,b</sup>, Yoong Ahm Kim<sup>a,\*</sup>, Kap Seung Yang<sup>a,\*\*</sup>, and Cheol-Min Yang<sup>b</sup>

<sup>a</sup> *Department of Polymer Engineering, Graduated School & School of Polymer Science and Engineering, Chonnam National University, 77 Yongbong-ro, Buk-gu, Gwangju, 500-757, Korea.*

<sup>b</sup> *Institute of Advanced Composite Materials, Korea Institute of Science and Technology (KIST), Eunha-ri San 101, Bongdong-eup, Wanju-gun, Jeollabukdo 565-905, Korea.*

*\*Corresponding author: Tel: +82-62-530-1871, Fax: +82-62-530-1920, E-mail: [yak@jnu.ac.kr](mailto:yak@jnu.ac.kr); \*\* Corresponding author: Tel: +82-62-530-1774, Fax: +82-62-530-1920, E-mail: [ksyang@jnu.ac.kr](mailto:ksyang@jnu.ac.kr).*

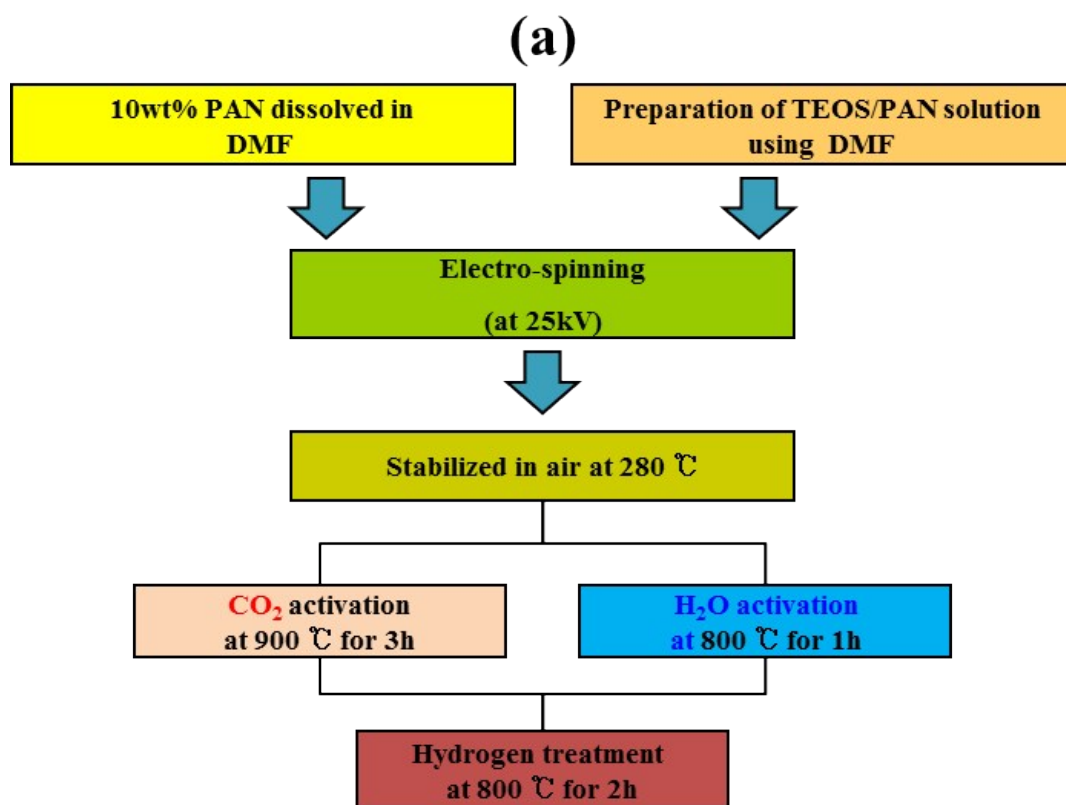

**(b)**

| Sample I.D.                               | Conditions                                                                                 |
|-------------------------------------------|--------------------------------------------------------------------------------------------|
| H <sub>2</sub> O-PAN                      | Steam-activated PAN-based CNFs at 800°C                                                    |
| CO <sub>2</sub> -PAN                      | CO <sub>2</sub> -activated PAN-based CNFs at 900°C                                         |
| H <sub>2</sub> O-H <sub>2</sub> -PAN      | Steam-activated and then hydrogen treated (at 800°C, 2h) of PAN-based CNFs                 |
| CO <sub>2</sub> -H <sub>2</sub> -PAN      | CO <sub>2</sub> -activated and then hydrogen treated (at 800°C, 2h) of PAN-based CNFs      |
| H <sub>2</sub> O-TEOS/PAN                 | Steam-activated TEOS/PAN-based CNFs at 800°C                                               |
| CO <sub>2</sub> -TEOS/PAN                 | CO <sub>2</sub> -activated TEOS/PAN-based CNFs at 900°C                                    |
| H <sub>2</sub> O-H <sub>2</sub> -TEOS/PAN | Steam-activated and then hydrogen treated (at 800°C, 2h) of TEOS/PAN-based CNFs            |
| CO <sub>2</sub> -H <sub>2</sub> -TEOS/PAN | CO <sub>2</sub> -activated and then hydrogen treated (at 800°C, 2h) of TEOS/PAN-based CNFs |

**Fig. S1** (a) Experimental procedure of preparing porous CNFs and (b) the identification of samples including the synthetic conditions.

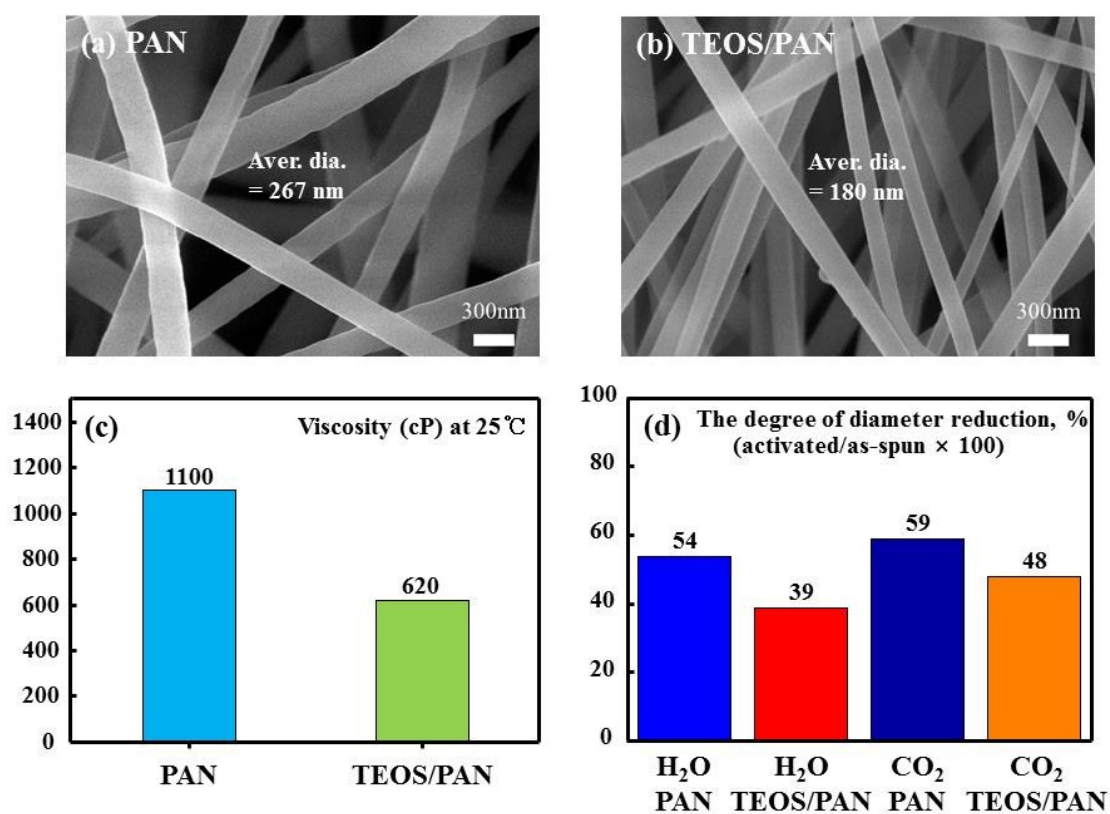

**Fig. S2** SEM images of the (a) PAN- and (b) TEOS/PAN-based electrospun organic nanofiber web. (c) The measured viscosity of both the electrospinning dopes using BROOKFIELD viscometer, DV-II+ at 25 °C and d) the degree of the diameter reduction via physical activation process.

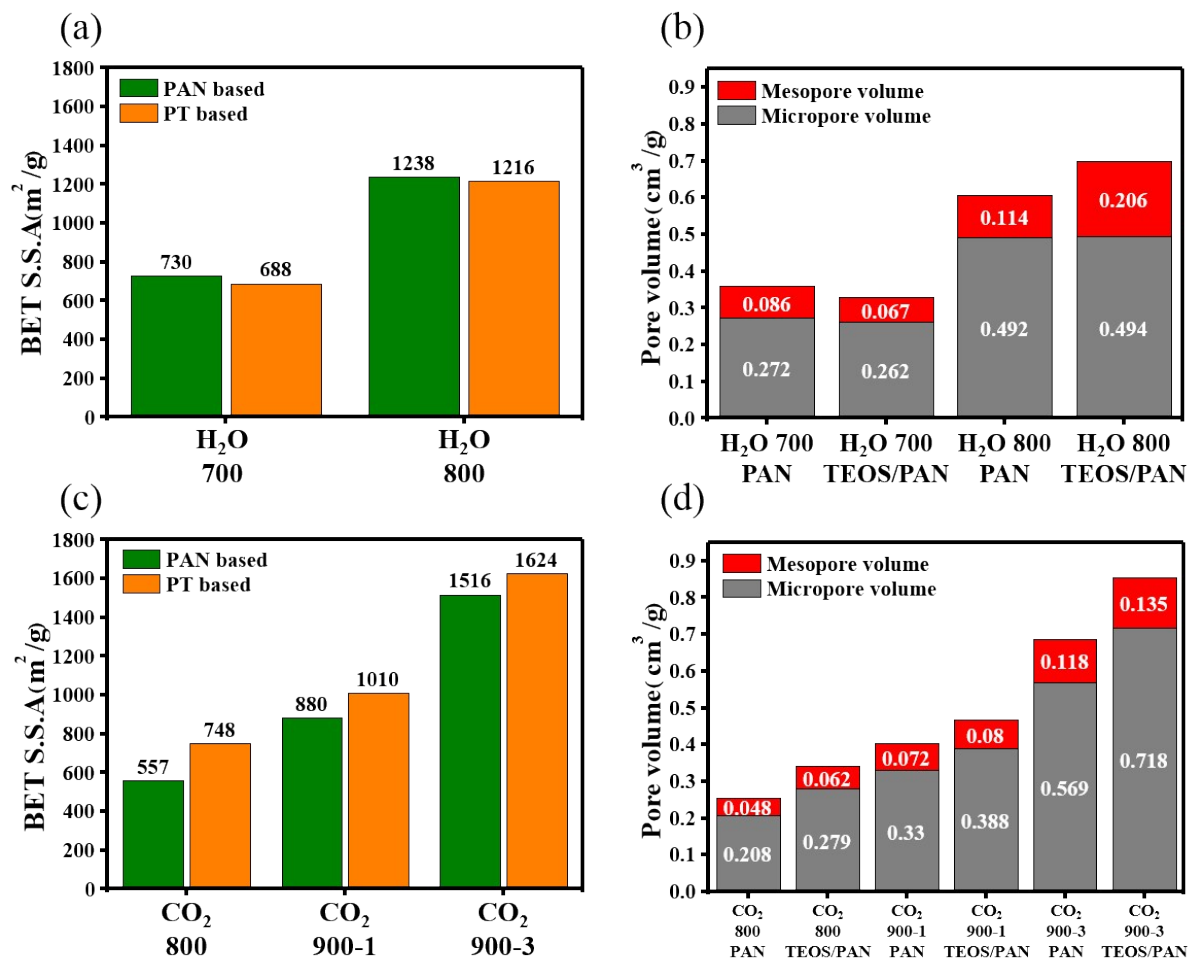

**Fig. S3** Variations of the BET surface area and pore volume for (a) and (b) H<sub>2</sub>O- and (c) and (d) CO<sub>2</sub>- activated CNFs as a function of activation temperature and time.

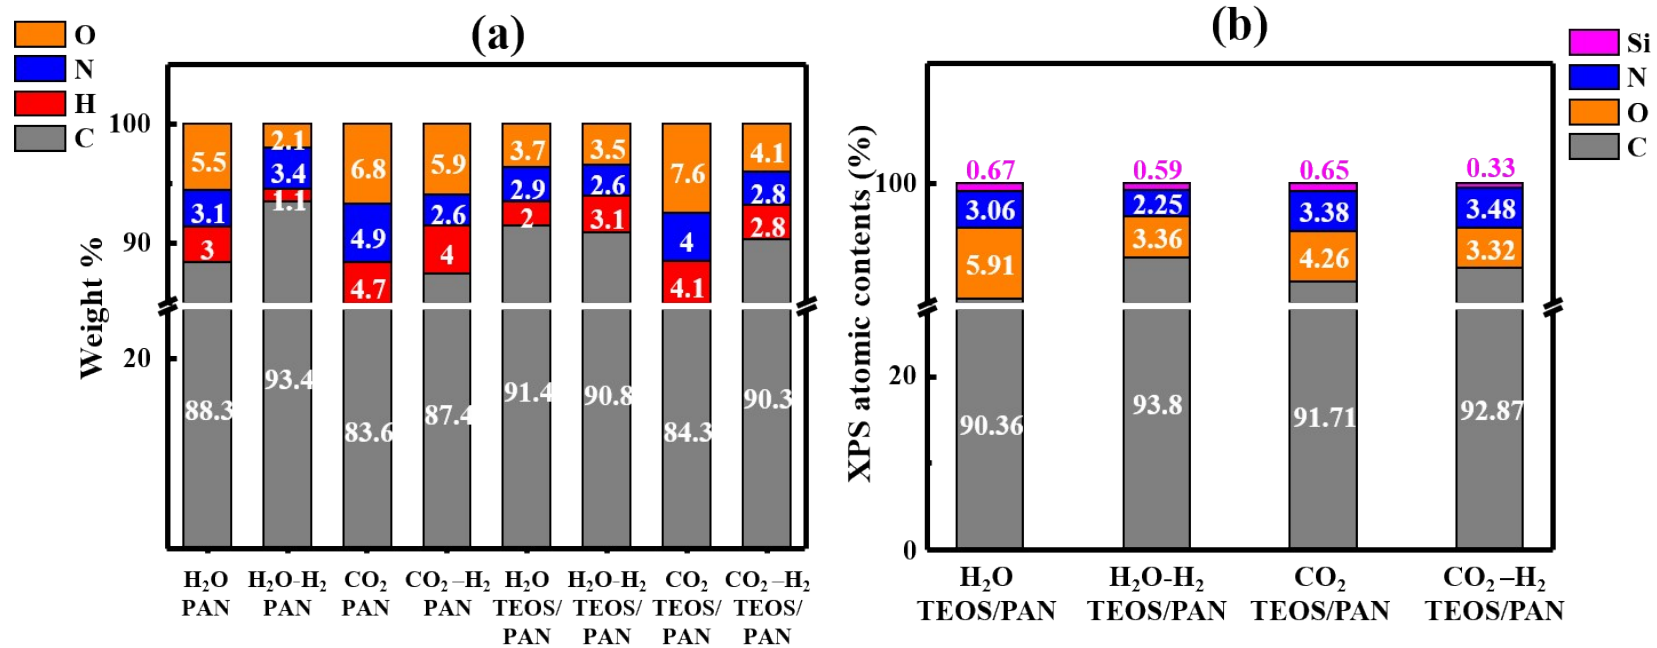

**Fig. S4** (a) Atomic composition of the porous CNFs from elemental analysis and (b) atomic composition of TEOS/PAN-based CNFs from X-ray photoelectron spectroscopy.

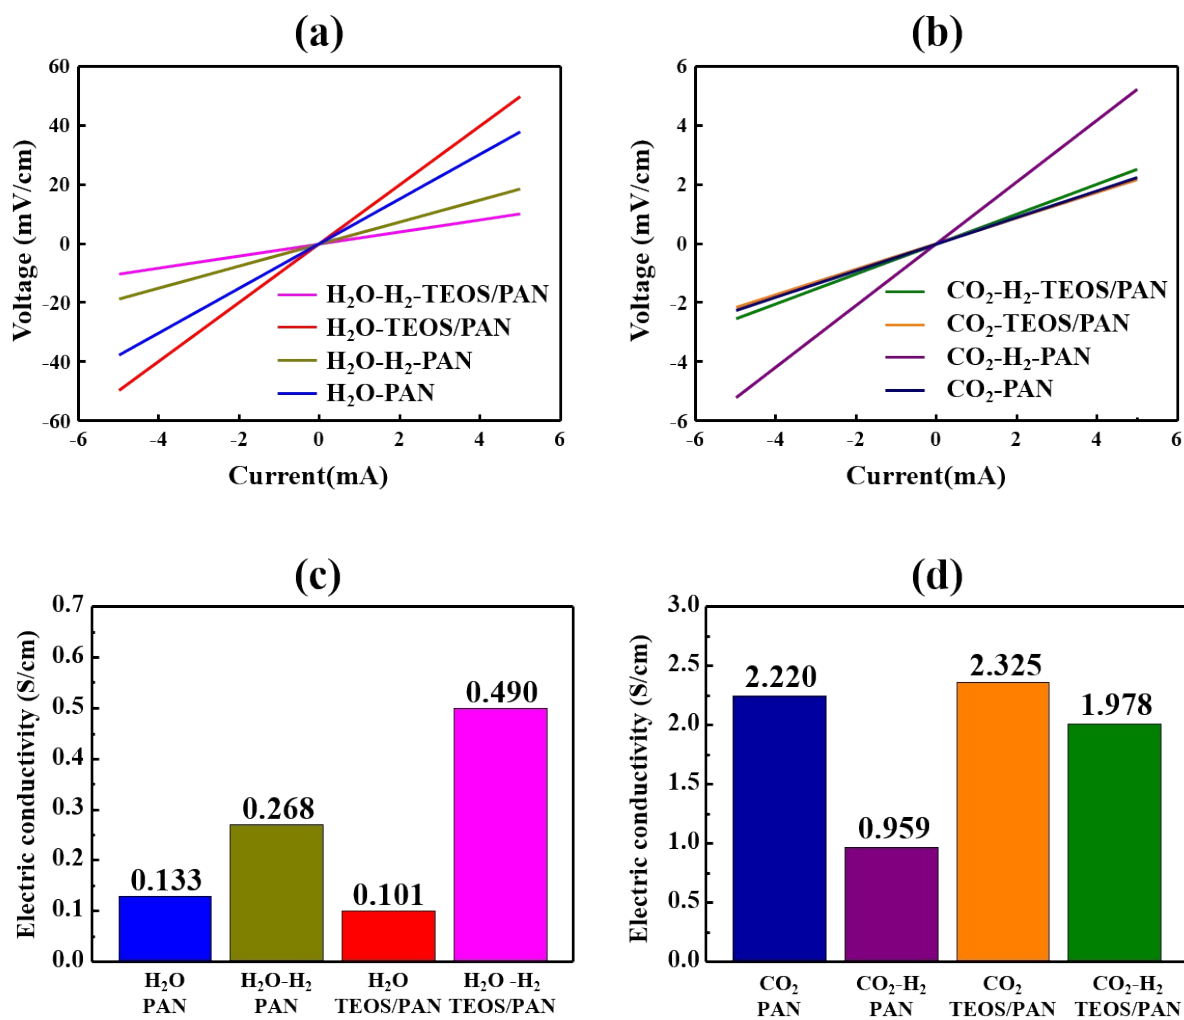

**Fig. S5** Specific current-voltage curves of (a) H<sub>2</sub>O- and (b) CO<sub>2</sub>-activated CNF webs ( $1.5 \times 3.5 \text{ cm}^2$ ) and (c, d) their corresponding electric conductivity.

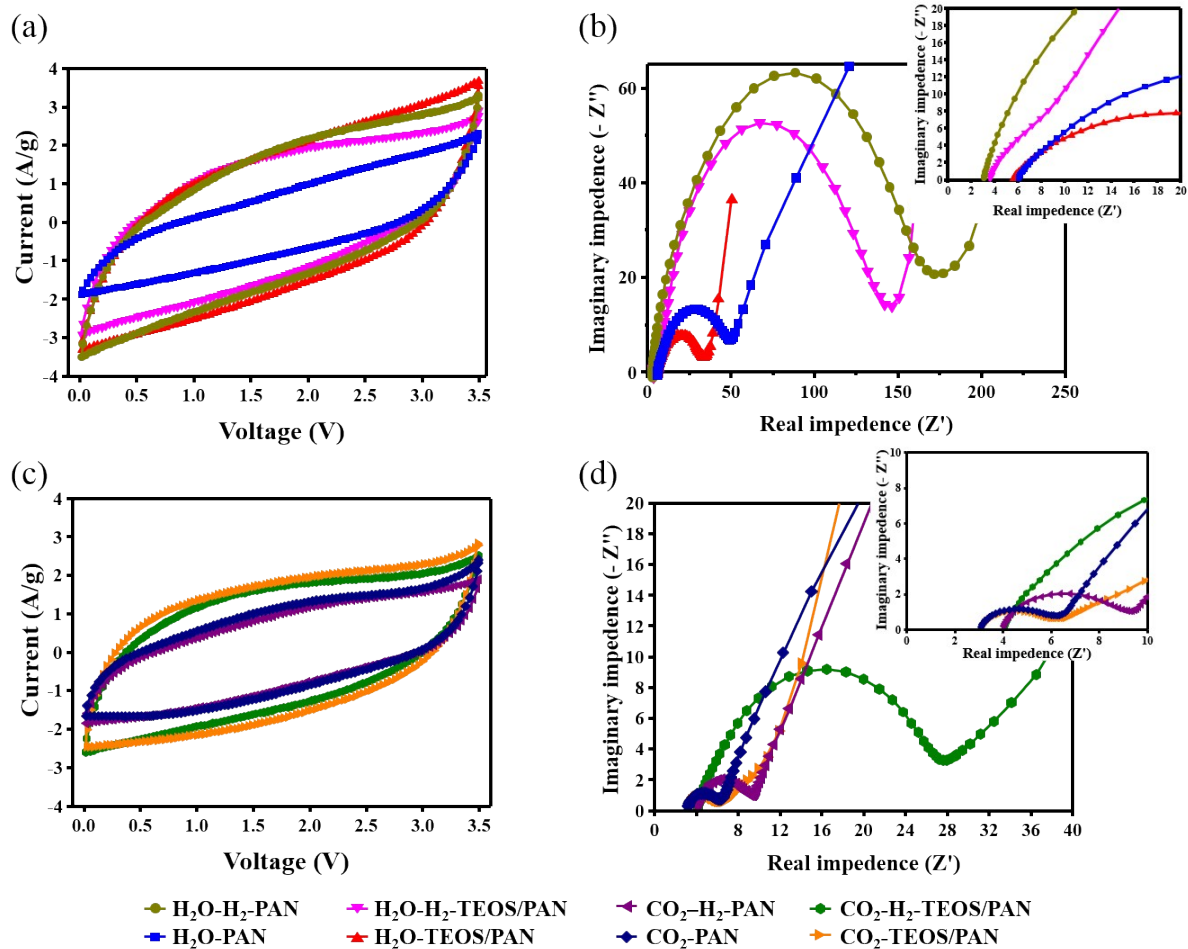

**Fig. S6** Cyclic voltammograms and impedance spectra of (a) and (b) H<sub>2</sub>O- and (c) and (d) CO<sub>2</sub>-activated CNFs. Insets in Fig. S5 (b) and (d) are the magnified high frequency region.

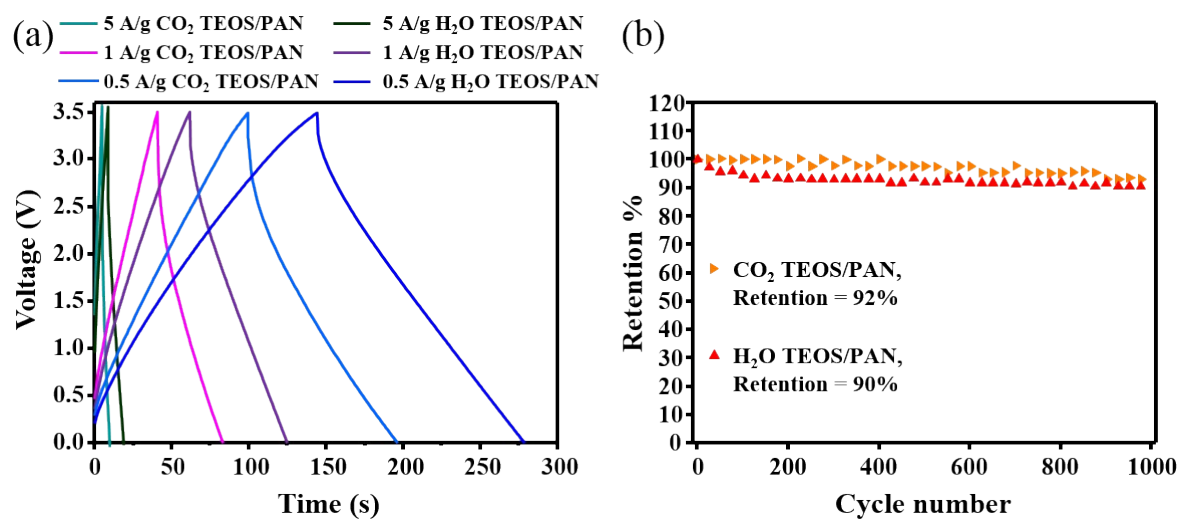

**Fig. S7** (a) Galvanostatic charge/discharge voltage profile and (b) cycle stability (1mA/cm<sup>2</sup> discharge rate) of H<sub>2</sub>O- and CO<sub>2</sub>-activated TEOS/PAN CNFs



**Table S1.** Comparison of specific capacitances, energy density and BET surface area of electro-spun based activated CNFs and other reported electro-spun activated CNFs in EMIm-TFSI.

|                    | <b>Electrode</b>                      | <b>Activation</b>                   | <b>Electrolyte</b> | <b>Capacitance (F/g), method</b>  | <b>Energy density (Wh/kg)</b> | <b>BET S.S.A (m<sup>2</sup>/g)</b> |
|--------------------|---------------------------------------|-------------------------------------|--------------------|-----------------------------------|-------------------------------|------------------------------------|
| This work          | Electrospun PAN/TEOS blended CNFs     | H <sub>2</sub> O or CO <sub>2</sub> | EMIm-TFSI          | 161 F/g, 3.5V, Charge/discharge   | 246 Wh/kg, 3.5V               | 1169 ~ 1624                        |
| Ref. <sup>12</sup> | Electrospun PAN/Nafion blended CNFs   | KOH                                 | EMIm-TFSI          | 180F/g, 4V, Cyclic voltammetry    | 80 Wh/kg, 4v                  | 339 ~ 2282                         |
| Ref. <sup>58</sup> | Electrospun PBI/Matrimid blended CNFs | H <sub>2</sub> O                    | EMIm-TFSI          | 126 F/g, 4V, Cyclic voltammetry   | 49 Wh/kg, 4V                  | 470 ~ 940                          |
| Ref. <sup>59</sup> | Electrospun PIM-1 CNFs                | H <sub>2</sub> O                    | EMIm-TFSI          | 120 F/g, 4V, Cyclic voltammetry   | 60 Wh/kg, 4V                  | 546 ~ 1162                         |
| Ref. <sup>60</sup> | Electrospun PAN/Nafion blended CNFs   | KOH                                 | EMIm-TFSI          | 150 F/g, 3.5V, Cyclic voltammetry | -                             | 1219 ~ 2282                        |
| Ref. <sup>61</sup> | Electrospun PAN/PMMA blends CNFs      | CO <sub>2</sub>                     | EMIm-TFSI          | 140 F/g, 4V, Cyclic voltammetry   | 101 Wh/kg, 4V                 | 2178 ~ 2419                        |

**Table S2.** Structural parameters of the PAN and TEOS/PAN based carbon nanofibers.

|                                   | PAN              |                                 |                 |                                 | TEOS/PAN         |                                 |                 |                                 |
|-----------------------------------|------------------|---------------------------------|-----------------|---------------------------------|------------------|---------------------------------|-----------------|---------------------------------|
|                                   | H <sub>2</sub> O | H <sub>2</sub> O-H <sub>2</sub> | CO <sub>2</sub> | CO <sub>2</sub> -H <sub>2</sub> | H <sub>2</sub> O | H <sub>2</sub> O-H <sub>2</sub> | CO <sub>2</sub> | CO <sub>2</sub> -H <sub>2</sub> |
| Average fiber diameter (nm)       | 123              | 103                             | 110             | 105                             | 109              | 83                              | 93              | 92                              |
| BET S.S.A (m <sup>2</sup> /g)     | 1238             | 1382                            | 1516            | 1544                            | 1216             | 1160                            | 1624            | 1568                            |
| Average pore diameter (nm)        | 1.957            | 2.039                           | 1.883           | 1.932                           | 2.303            | 2.212                           | 2.101           | 2.088                           |
| *Average micro pore diameter (nm) | 0.734            | 0.789                           | 0.743           | 0.790                           | 0.787            | 0.781                           | 0.814           | 0.831                           |
| Pore volume (cm <sup>3</sup> /g)  | 0.606            | 0.704                           | 0.714           | 0.746                           | 0.700            | 0.641                           | 0.853           | 0.819                           |
| **Electric conductivity (S/cm)    | 0.133            | 0.268                           | 2.220           | 0.959                           | 0.101            | 0.490                           | 2.325           | 1.978                           |
| ***R value                        | 0.938            | 0.968                           | 0.950           | 0.997                           | 0.960            | 0.961                           | 0.941           | 0.980                           |
| ****L <sub>a</sub> (nm)           | 4.639            | 4.492                           | 4.580           | 4.365                           | 4.533            | 4.526                           | 4.622           | 4.440                           |

\* Average micro pore diameter calculated by alpha-s method

\*\* Electric conductivity measured by using 4 probe method. Note that CNF webs size is 1.5 cm × 3.5 cm.

\*\*\* R value = intensity of D band / intensity of G band

\*\*\*\* L<sub>a</sub> = R value / 4.35
